# Supplementary material for: A new kind of transparent and self-cleaning film for solar cells
Source: Royal Society of Chemistry journal article supplement (doi:10.1039/c6nr03537j), 2016-01-01
Supplement: c6nr03537j3.pdf [file c6nr03537j3.pdf]

## Electronic Supplementary Material (ESI) for Nanoscale.

### A new kind of transparent and self-cleaning film for solar cell

Qi Xu<sup>a</sup>, Qi Zhao<sup>a</sup>, Xiaofei Zhu<sup>a</sup>, Li Cheng<sup>a</sup>, Suo Bai<sup>a</sup>, Zenghua Wang<sup>a</sup>, Leixing Meng<sup>a</sup> and Yong Qin<sup>a\*</sup>

*a. Institute of Nanoscience and Nanotechnology, School of Physical Science and Technology, Lanzhou University, Lanzhou, 730000, China.*

*\* To whom correspondence should be addressed, E-mail: qinyong@lzu.edu.cn*

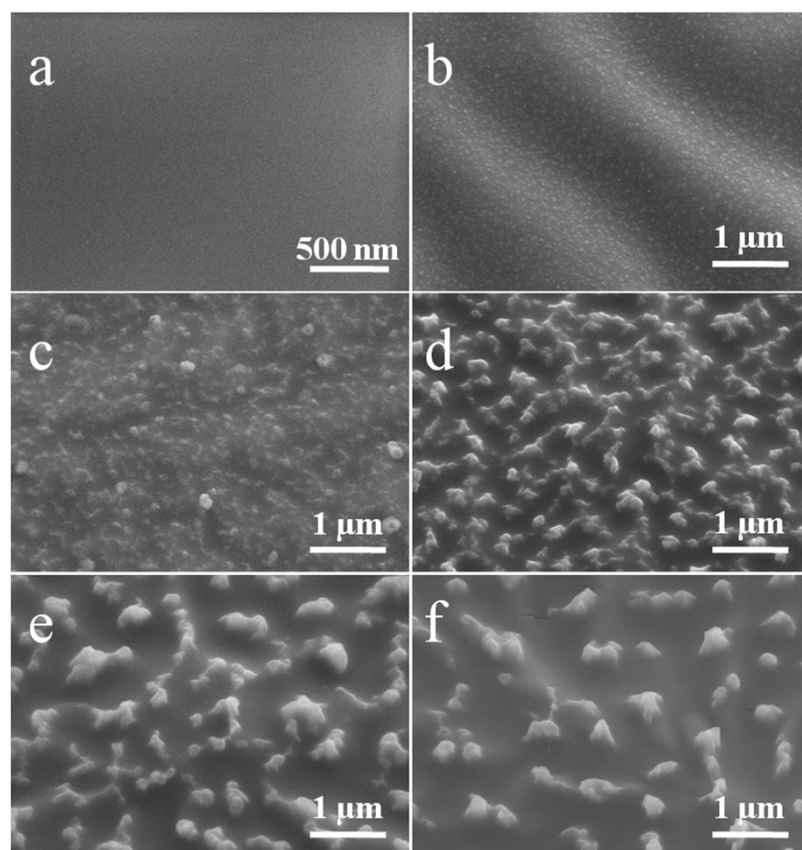

Figure S1. The morphology of the PDMS after etching for different time. (a)-(f) correspond to 1, 5, 10, 12, 16, 20 min.
